# Supplementary material for: Structural and bonding properties of BS−/0 and BS3−/0
Source: Royal Society of Chemistry journal article supplement (doi:10.1039/c8nj01835a), 2018-01-01
Supplement: c8nj01835a1.pdf [file c8nj01835a1.pdf]

## Supporting Information

### **Structural and Bonding Properties of $\text{BS}^{-/0}$ and $\text{BS}_3^{-/0}$**

Li-Juan Zhao,<sup>1</sup> Xi-Ling Xu,<sup>1\*</sup> Hong-Guang Xu,<sup>1</sup> Gang Feng,<sup>2</sup> Wei-Jun Zheng<sup>1,3\*</sup>

*<sup>1</sup>Beijing National Laboratory for Molecular Sciences, State Key Laboratory of  
Molecular Reaction Dynamics, Institute of Chemistry, Chinese Academy of Sciences,  
Beijing 100190, China*

*<sup>2</sup>School of Chemistry and Chemical Engineering, Chongqing University,  
Chongqing 401331, China*

*<sup>3</sup>University of Chinese Academy of Sciences, Beijing 100049, China*

\* Corresponding authors. E-mail: [xlxu@iccas.ac.cn](mailto:xlxu@iccas.ac.cn), [zhengwj@iccas.ac.cn](mailto:zhengwj@iccas.ac.cn)

Tel: +86 10 62635054, Fax: +86 10 62563167

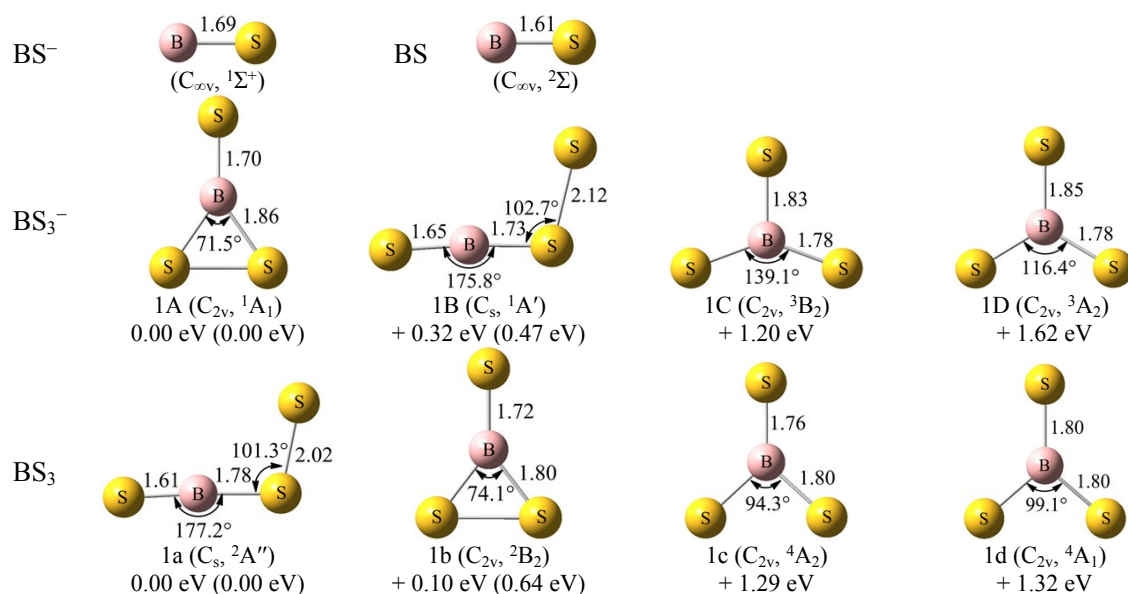

**Fig. S1** Typical low-lying isomers of BS<sup>-</sup> and BS<sub>3</sub><sup>-</sup> as well as their corresponding neutrals. The electronic state, bond lengths (in Å) and bond angles are labeled. The relative energies to their most stable isomers obtained at the B3LYP and single-point CCSD(T) levels are given with the ones at the CCSD(T) level in the parentheses.

**Table S1** Relative energies, ADEs and VDEs of the low-lying isomers of BS<sup>-</sup> and BS<sub>3</sub><sup>-</sup> obtained by theoretical calculations and the comparison with experimental ADEs and VDEs.

| Isomer                       |                                                  | ADE (eV)         |                      |                      |                      | VDE (eV)         |                      |                      |
|------------------------------|--------------------------------------------------|------------------|----------------------|----------------------|----------------------|------------------|----------------------|----------------------|
|                              |                                                  | Theo.            |                      |                      | Expt.                | Theo.            |                      |                      |
|                              |                                                  | MP2 <sup>b</sup> | CCSD(T) <sup>c</sup> | CCSD(T) <sup>d</sup> |                      | MP2 <sup>b</sup> | CCSD(T) <sup>c</sup> | Expt.                |
| BS <sup>-</sup>              | C <sub>∞v</sub> , <sup>1</sup> Σ <sup>+</sup>    | 2.21             | 2.29                 | 2.30                 | 2.32(5) <sup>a</sup> | 2.31             | 2.36                 | 2.47(5) <sup>a</sup> |
| BS <sub>3</sub> <sup>-</sup> | 1A C <sub>2v</sub> , <sup>1</sup> A <sub>1</sub> |                  | 3.34                 | 3.44                 | 3.34(5) <sup>a</sup> |                  | 3.44                 | 3.42(5) <sup>a</sup> |
|                              | 1B C <sub>s</sub> , <sup>1</sup> A'              |                  | 2.87                 |                      |                      |                  | 3.01                 |                      |

<sup>a</sup>The numbers in the parentheses indicate the uncertainties of the experimental values in the last digits.

<sup>b</sup>obtained at the MP2(full) level/aug-cc-pVTZ level.

<sup>c</sup>obtained at the single-point CCSD(T) level/aug-cc-pVTZ level.

<sup>d</sup>obtained at the single-point CCSD(T) level/CBS level.
